# Supplementary material for: Evidence from EXAFS for Different Ta/Ti Site Occupancy in High Critical Current Density Nb3Sn Superconductor Wires
Source: Springer Nature journal article supplement (doi:10.1038/s41598-018-22924-3), 2018-03-13
Supplement: 41598_2018_22924_MOESM1_ESM.pdf [file 41598_2018_22924_MOESM1_ESM.pdf]

## Supplementary Information

### **Evidence from EXAFS for Different Ta/Ti Site Occupancy in High Critical Current Density Nb<sub>3</sub>Sn Superconductor Wires**

Steve M. Heald,<sup>1</sup> Chiara Tarantini,<sup>2\*</sup> Peter J. Lee,<sup>2</sup> Michael Brown,<sup>2</sup> ZuHawn Sung,<sup>2</sup> Arup K. Ghosh,<sup>3</sup> David C. Larbalestier<sup>2</sup>

<sup>1</sup>*Advanced Photon Source, Argonne National Lab, Argonne IL 60439 USA*

<sup>2</sup>*National High Magnetic Field Laboratory, Florida State University, Tallahassee, Florida 32310, USA*

<sup>3</sup>*Retired, formerly Magnet Division, Brookhaven National Laboratory, Upton, New York 11973, USA*

The raw  $\chi(k)$  data are shown in Figure S1 for the Ta data and in Figure S2 for the Ti data.

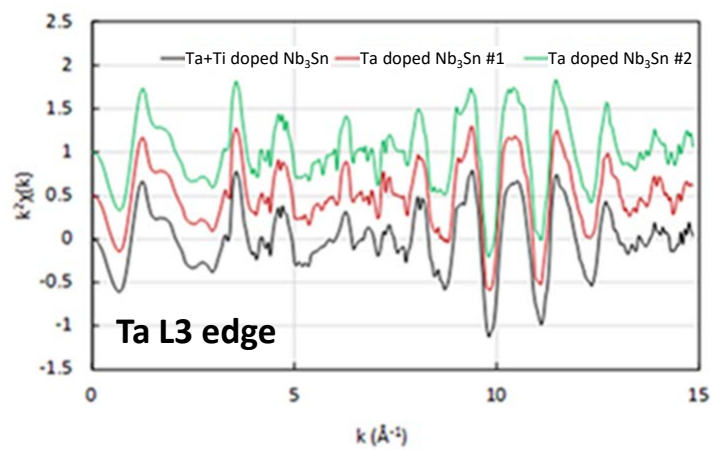

Figure S1.  $k^2$  weighted  $\chi(k)$  data for the Ta L3 edge.

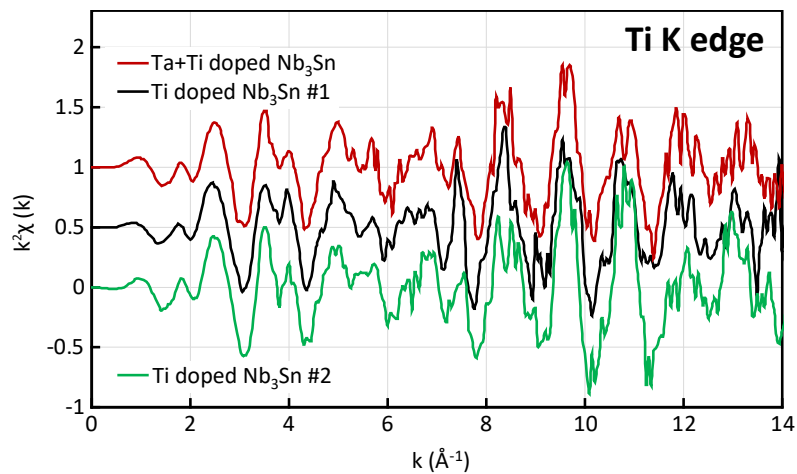

Figure S2.  $k^2$  weighted  $\chi(k)$  data for the Ti K edge.
